# 1 **Lyophilized cell-free systems display tolerance to organic solvent exposure**

2 Marilyn S. Lee<sup>a</sup>, Rebecca M. Raig<sup>b,c</sup>, Maneesh K. Gupta<sup>b</sup>, Matthew W. Lux<sup>a\*</sup>

3 <sup>a</sup>US Army Combat Capabilities Development Command Chemical and Biological Center, 8567

4 Ricketts Point Road, Aberdeen Proving Ground, MD 21010 USA, <sup>b</sup>US Air Force Research

5 Laboratory, 2179 12<sup>th</sup> St., B652/R122 Wright-Patterson Air Force Base, OH 45433 USA, <sup>c</sup>UES

6 Inc., 4401 Dayton-Xenia Rd., Dayton, OH 45432 USA

7

8 \*Corresponding author:

9 Matthew W. Lux

10 Correspondence: 8567 Ricketts Point Road, Bldg E3549 Room B140, APG, MD USA 21010

11 Phone: 410-436-1448

12 Email: [matthew.w.lux.civ@mail.mil](mailto:matthew.w.lux.civ@mail.mil)

13

## 14 **Abstract**

15 Cell-free systems offer a powerful way to deliver biochemical activity to the field without cold  
16 chain storage. These systems are capable of sensing as well as biosynthesis of useful molecules  
17 at the point of need. So far, cell-free protein synthesis (CFPS) reactions have been studied as  
18 aqueous solutions in test tubes or absorbed into paper or cloth. Embedding biological  
19 functionality into broadly-used materials, such as plastic polymers, represents an attractive  
20 goal. Unfortunately, this goal has for the most part remained out of reach, presumably due to  
21 the fragility of biological systems outside of aqueous environments. Here, we describe a  
22 surprising and useful feature of lyophilized cell-free lysate systems: tolerance to a variety of  
23 organic solvents. Screens of individual CFPS reagents and different CFPS methods reveal that  
24 solvent tolerance varies by CFPS reagent composition. Tolerance to suspension in organic  
25 solvents may facilitate the use of polymers to deliver dry cell-free reactions in the form of  
26 coatings or fibers, or allow dosing of analytes or substrates dissolved in non-aqueous solvents,  
27 among other processing possibilities.

28

29 **Keywords** Cell-free systems, Protein Stability, Organic Solvents

30

## 31 **Introduction**

32 Cell-free systems are a collection of techniques for activating cellular machinery outside of  
33 living cells. Key cell-like functionalities in these systems include cell-free protein synthesis  
34 (CFPS)(1–4) and complex metabolism that can both provide energy to the system and produce  
35 small molecules of interest (5–9). In these reactions there is no need to maintain cell growth or  
36 viability, and removal of the cell membrane facilitates direct addition or measurement of  
37 molecules like DNA. These systems have been used for a wide range of applications, including  
38 sensing, manufacturing, genetic prototyping, and education (10). There are two main  
39 approaches to reconstitute cellular activity *in vitro* (Figure 1A). One approach is the use of crude  
40 cell lysates, where cells are broken open and additional building blocks and buffers are added  
41 to allow the proteins and other components in the lysate to retain much of their native function  
42 (3, 11). Since many undefined components from the cell are still present, there is limited  
43 control over biochemical activity. Another approach is the PURE system, where the protein  
44 components essential for transcription, translation, and energy cycling are purified before the  
45 mixture is reconstituted with energy and substrate solutions (12). This system is much better  
46 defined, though it is more expensive to implement and lacks any metabolic enzymes present in  
47 lysate that are not individually identified and purified to be included in the reaction.

48  
49 A major emerging application of CFPS reactions is rapid field-deployed sensing (13–17) or  
50 molecule production at the point of need (17, 18) with minimal required equipment. Though  
51 many biological reagents are normally stored frozen or refrigerated, CFPS reactions may be  
52 lyophilized for room temperature storage and retain high levels of protein synthesis activity  
53 upon rehydration (19–21). CFPS may be used to quickly prototype and implement gene circuit  
54 designs that can sense analytes via a variety of mechanisms and produce human readable  
55 outputs such as a colorimetric, fluorescent, or even electrochemical reporters (22). Drying CFPS  
56 reactions onto paper tickets or cloth has greatly broadened the scope of applications for cell-  
57 free techniques (13, 14, 16, 23, 24). Paper-based reactions retain activity, enabling formats  
58 similar to pH paper that are less cumbersome for field use. One draw-back to CFPS reactions is  
59 that short reaction lifetimes of a few hours make these systems one-use only. A second draw-  
60 back is the need to manually add water to activate the lyophilized reaction. Turning to material  
61 science to once again redesign the reaction environment could alleviate these issues.

62  
63 There is great potential to leverage materials to modulate hydration, and therefore control  
64 activation of cell-free systems. Polymers have been widely used to control release timing for  
65 cargos that include anything from pharmaceuticals to fertilizers (25, 26). The same principle  
66 may be used to extend the lifetime of activity of a detection device. For instance, continual  
67 activation of fresh bio-active cargo, such as enzymes, embedded in a material may be achieved  
68 by polymer erosion (27, 28). However, this type of formulation requires the biological molecule  
69 to be cast into polymers that have low solubility in water, likely necessitating the application of  
70 heat or organic solvents. These treatments have a deleterious effect on the activity of most  
71 enzymes unless their structure can be protected in some way (29). For a complex mixture like  
72 CFPS reactions, it would be reasonable to suspect that such effects on any of the numerous

73 enzymes and other constituent components could result in reduction or elimination of overall  
74 protein production.

75  
76 Non-aqueous enzymology is the study of protein behavior in non-aqueous organic solvents.  
77 Over the past few decades, researchers in this field have shown that a subset of purified  
78 proteins can, under certain circumstances, maintain their fold and even activity when  
79 suspended in organic solvents (30, 31). An important factor influencing protein behavior in  
80 organic solvents is the amount of water present in the mixture. Too much water will allow the  
81 protein to change conformations, leading to irreversible folding and inactivation. This has been  
82 seen in studies titrating organic solvents into aqueous bio-mixtures such as a CFPS reaction (32,  
83 33). Therefore, freeze-drying or spray-drying is necessary to carefully remove water from an  
84 enzyme sample before solvent addition to better maintain enzyme activity. Indeed, a crystal  
85 structure obtained for subtilisin in pure acetonitrile demonstrates that protein structure in this  
86 solvent is very similar to the native aqueous structure (31). Tolerance to non-aqueous solvents  
87 has been studied for a small subset of purified proteins, but has never before been explored for  
88 a complex bio-mixture like a CFPS reaction in which many proteins, nucleic acids, and  
89 metabolites must be preserved to maintain transcription and translation activity.

90  
91 In this work we describe the effects of exposing lyophilized CFPS reactions to organic solvents.  
92 We find that CFPS activity is recovered upon rehydration after exposure of the dried reaction to  
93 a variety of organic solvents, though some polar solvents such as ethanol reduce activity.  
94 Screens of CFPS reaction recipes, reagent mix components, and solvent removal methods  
95 indicate that tolerance to certain solvents is dependent on the presence of additives. Further,  
96 we discuss how solvent tolerance of CFPS systems may open the door to new applications by  
97 embedding dried CFPS components in new types of polymer materials via solvent casting or  
98 sensing analytes in non-aqueous samples.

99

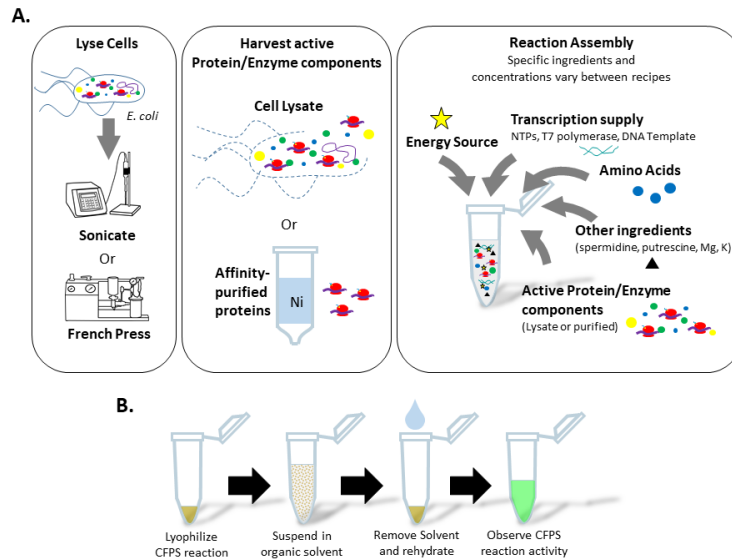

100

101

102 **Figure 1.** (A) Illustration of the composition of a CFPS reaction and variation in published

103 protocols among lysis methods, purity of active enzyme components, and buffer ingredients.

104 (B) Treatment sequence for CFPS reactions includes lyophilization, suspension in an organic

105 solvent, removal of the organic solvent, rehydration, and assessment of CFPS activity via

106 monitoring the appearance of GFP.

107

## 107 Results and Discussion

108

### 108 Solvent screen

109 Initial experiments exposing CFPS reactions to organic solvents utilized an *E. coli* lysate system

110 closely mimicking the recipe constructed by Jewett *et al.* (11) and referred to as PANox-SP. A

111 panel of solvents including acetone, acetonitrile, chloroform, dichloromethane (DCM),

112 dimethylformamide (DMF), dimethylsulfoxide (DMSO), ethanol, ethyl acetate, methanol, and

113 tetrahydrofuran (THF) were used to challenge both the *E. coli* lysate component lyophilized

114 alone, and the complete lyophilized CFPS reaction mixture. The treatment sequence is

115 summarized in Figure 1B. Solvent properties are summarized in Supplementary Table S1. Each

116 solvent was mixed with the dry cake in microplate wells to form a suspension, then incubated

117 for 1 hour at room temperature. The dried CFPS cake material is largely insoluble in all the

118 organic solvents tested, with insoluble particulates settling quickly after mixing. The solvents

119 were removed by aspiration after brief centrifugation to settle the CFPS material into a pellet.

120 Residual solvent was removed by evaporation at reduced pressure. Then, the reactions were

121 rehydrated with water to reach the desired reaction volume. For samples in which only the

122 lysate is dried and exposed to solvent, the other components of the CFPS reaction were added

123 in the form of aqueous solutions at the rehydration step to initiate protein synthesis activity.

124

125 CFPS activity was assessed by tracking GFP production from a plasmid DNA template with a T7

126 promoter (Figure 2, Supplementary Figure S1). We note here that variability of some

127 experimental replicates in this study are higher than in other recent CFPS works that report 6.8-  
128 11% variability for individually mixed replicates (34–36). We attribute this difference to either  
129 variable loss of some particulate during solvent aspiration or variable penetration of the solvent  
130 into particulates during exposures. GFP productivity after organic solvent exposure clearly has  
131 some dependence on both the properties of the solvent and the components included during  
132 drying and solvent exposure. When the complete reaction is exposed to organic solvents,  
133 acetonitrile and ethyl acetate exposure did not result in any loss of activity; acetone, THF,  
134 Chloroform, and DCM caused partial loss in activity; and ethanol, DMF, DMSO, and methanol  
135 caused total or near total loss of activity. When lysate alone is exposed to solvents, a different  
136 pattern emerges: acetonitrile and ethyl acetate again show no loss of activity; acetone, ethanol,  
137 chloroform, DMF, methanol, and DCM all yield varying levels of activity; and DMSO and THF  
138 completely deactivate the un-supplemented lysate. It is notable that, depending on the solvent  
139 type, activity may only be lost for the complete reaction (DMF, Methanol, Ethanol) or only for  
140 the lysate (THF), suggesting multiple mechanisms for CFPS inactivation are present.

141

142 There are several possible ways treatment with an organic solvent might impact the  
143 productivity of a CFPS reaction. First, the solvent could cause protein unfolding in the lysate or  
144 supplemented polymerase and RNase inhibitor protein components in the dry state. Second,  
145 the solvent could extract critical resource molecules from the dried cake into solution and  
146 cause them to be removed from the system when the solvent is aspirated away. Third, residual  
147 solvent not sufficiently removed by evaporation could cause protein unfolding or other  
148 inhibition when water is re-introduced (32). Depending on the properties of each solvent, a  
149 different combination of these effects may have an impact.

150

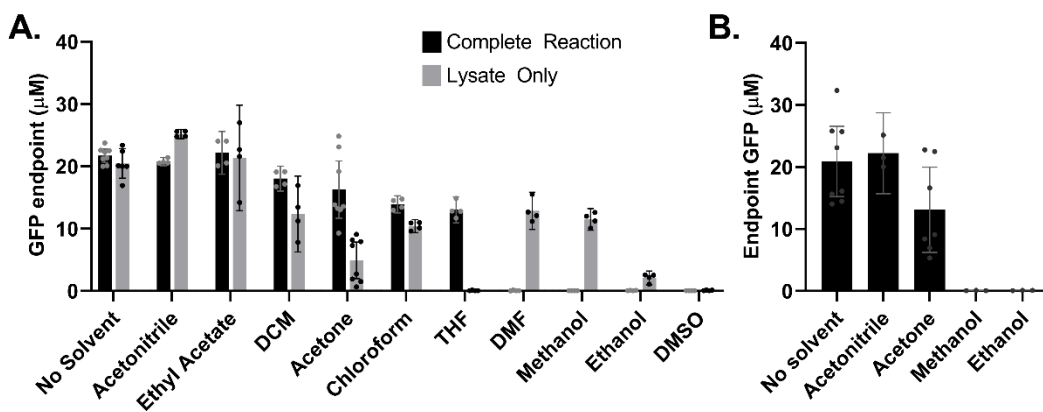

151

152 **Figure 2** (A) Endpoint concentration of GFP in reaction mixtures after lyophilized lysate (grey  
153 bars) or complete CFPS reactions (black bars) were exposed to an organic solvent and  
154 rehydrated. In the “no solvent” control the dried reactions were rehydrated without solvent  
155 exposure. Error bars represent the 95% confidence interval. (B) Activity post-solvent exposure  
156 and evaporation at ambient conditions.

157

158 We investigated whether specific solvent properties correlated with CFPS productivity results  
159 (Supplementary Figures S2 and S3, and Supplementary Tables S2 and S3). Statistically significant  
160 correlations were observed for complete reaction exposures but not for lysate alone. These  
161 correlations could prove informative for selection of additional solvents. For example, low  
162 solvent hydrogen bonding propensity correlated well with higher productivity. Still, due to the  
163 complexity of potential solvent interactions with the components of the CFPS reaction,  
164 prediction of the compatibility of different solvents or solvent blends is difficult without  
165 experiment. Thorough discussion of correlation results may be found in the supplementary  
166 information.

167  
168 Further experiments were designed to investigate the impact of solvent removal method and  
169 lyophilization at larger scale. For some applications, it may not be possible to apply a vacuum to  
170 evaporate solvent at reduced pressure. We found that application of a vacuum was  
171 unnecessary for maintenance of complete CFPS reaction activity after exposure to acetonitrile  
172 or acetone (Figure 2B). Further, washing with volatile acetonitrile did not improve activity after  
173 exposure to less-volatile DMSO (Supplementary Figure S4). These experiments indicated that  
174 solvent tolerance was not very sensitive to solvent removal method, at least for the subset  
175 tested. Applications such as casting dried CFPS into a material may require much larger  
176 quantities of lyophilized CFPS powder than the microplate scale used for screening. We  
177 lyophilized larger (250  $\mu$ L vs 15  $\mu$ L) batches of PANOx-SP CFPS reactions and exposed them to  
178 acetone. We found that CFPS activity was maintained (Supplementary Figure S5).  
179 Thermogravimetric analysis (TGA) was a useful technique to confirm a water content of less  
180 than 3% (wt/wt). Further discussion of these results may be found in the supplementary  
181 information.

### 182 183 *CFPS reaction component screen for acetone tolerance*

184 The observation that the complete dried CFPS reaction performed better than the lysate alone  
185 after exposure to acetone, chloroform, or THF suggested that some component of the resource  
186 mix might act as a protective additive. To test this hypothesis, components of the resource mix  
187 were combined with lysate individually and screened for protective effects upon exposure to  
188 acetone and removal of the solvent without a vacuum. In this experiment, three “components”  
189 are themselves aqueous mixtures. “10xSS” contains magnesium, potassium, and ammonium  
190 glutamate. “15xMM” contains ATP, GTP, UTP, CTP, folinic acid, and tRNA. “20AA” is a mixture of  
191 all 20 canonical amino acids. For experimental expediency, samples were rehydrated with a  
192 reagent mix containing all reagents, resulting in doubled final concentrations for the individual  
193 component screened. Interestingly, only the 15xMM and PEP resulted in statistically significant  
194 difference in the productivity due to increased concentration without acetone exposure (Figure  
195 S6). Activity decreased in both cases, either because of the change in final concentration or  
196 because the component has some negative effect on the lysate during the lyophilization  
197 process. After acetone treatment, CFPS ingredients each have varying relative effects on GFP  
198 productivity (Figure 3). Plasmid DNA and HEPES buffer both significantly stabilize the lysate.

199 Remarkably, the 10xSS component alone is sufficient to stabilize the lysate to acetone exposure  
200 as well as the complete reaction mixture. This experiment is the first confirmation that altering  
201 the composition of the lyophilized CFPS reaction mixture greatly impacts tolerance to organic  
202 solvent exposure.  
203

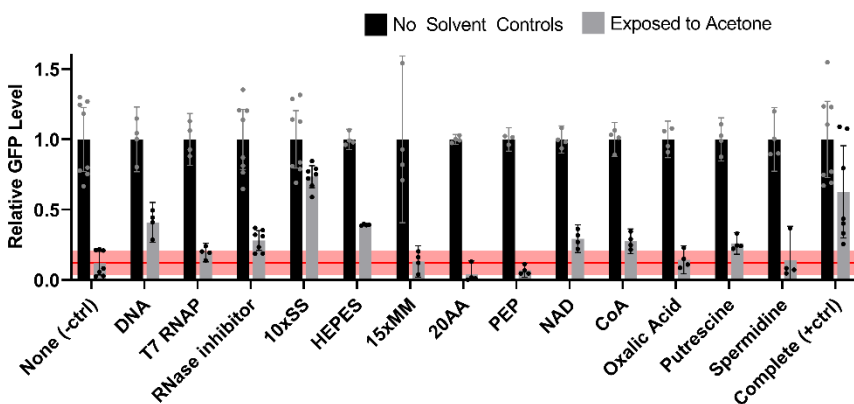

204  
205 **Figure 3** Screen of CFPS components for protective effect during acetone exposure. Black bars  
206 are results from controls without solvent exposure. Grey bars refer to a 1 hr acetone exposure.  
207 Acetone is evaporated under ambient conditions in this experiment. Each set of bars is labeled  
208 with the CFPS ingredient used to supplement the lysate sample during drying. The negative  
209 control labeled “None” is lysate without any supplemented additive. The positive control  
210 labeled “Complete” includes all CFPS ingredients. The red reference line coincides with the  
211 mean fraction of GFP productivity of an un-supplemented lysate control exposed to acetone,  
212 with lighter red shading representing the 95% confidence interval. GFP levels are normalized to  
213 the no solvent control treatment for each component. Figure S6 depicts the data without  
214 normalization.

### 215 Comparing the solvent tolerance of different published CFPS styles

216 The clear dependence of solvent tolerance on the composition of the reaction led us to  
217 investigate solvent tolerance across different published CFPS systems. We tested the  
218 performance of three systems: the commercial PURExpress system based on the PURE  
219 approach described above (12), the PANOX-SP system used in all experiments above (11), and  
220 the 3-PGA system which uses a different strain of *E. coli*, lysis method, and recipe for reaction  
221 additives (3, 37). Supplementary Table S4 is a side-by-side comparison of the composition of  
222 the CFPS reaction for each recipe. In each case, the reactions are lyophilized and exposed to  
223 solvent as described above, with four solvent conditions tested: acetone, acetonitrile,  
224 chloroform, or no solvent.  
225

226  
227 The GFP productivity results confirm that alternate CFPS recipes respond to solvents in different  
228 ways (Figure 4, Supplementary Figure S7). Compared to the lysate-based CFPS reactions, the  
229 PURExpress formulation has less starting productivity but also minimal sensitivity to treatments



230 with the three solvents tested. Chloroform was the only solvent that significantly reduced GFP  
231 productivity in the PURExpress system. On the other hand, the two lysate-based CFPS recipes  
232 have very different susceptibility to the organic solvents. 3-PGA is much more susceptible to  
233 inactivation by solvent exposure across all three solvent types compared to PANOx-SP.

234  
235 To learn what components of the CFPS reaction are responsible for increased solvent  
236 sensitivity, the *E. coli* extract and reagent mix components of PANOx-SP and 3-PGA CFPS recipes  
237 were swapped so that PANOx-SP extract and 3-PGA reagent mix were combined in the “Hybrid  
238 A” mixture and 3-PGA extract and PANOx-SP reagent mix were combined in the “Hybrid B”  
239 mixture. These hybrid CFPS recipes were then lyophilized, treated with solvent, and rehydrated  
240 as before. The results of this test clearly show that samples containing 3-PGA reagents are more  
241 susceptible to solvent inactivation than samples containing PANOx-SP reagents. When  
242 combined with PANOx-SP reagent mix, 3-PGA extract performed very similarly to PANOx-SP,  
243 indicating that differences in the cell extract were not the primary factor contributing to solvent  
244 sensitivity. While our focus here was on differences in solvent tolerance and not relative  
245 productivity of each system, the hybrid mixtures offer an interesting opportunity to interpret  
246 productivity trends in the no solvent cases. It is first worth noting that our yields here are lower  
247 than those in the literature for each case, which could be a result of the lyophilization step,  
248 unintentional differences in protocol execution, DNA construct, reaction conditions, etc.  
249 Nonetheless, we observed that despite no significant difference for the base PANOx-SP and 3-  
250 PGA systems, we saw a significant decrease from PANOx-SP to Hybrid A, and a significant  
251 increase from 3-PGA to Hybrid B. This result indicates that, at least for our specific  
252 implementation and conditions, the PANOx-SP reagent mix yields more protein than 3-PGA  
253 reagent mix. Among many differences in the supplemented reagents, a major difference is the  
254 type of energy source. PANOx-SP makes use of phosphoenolpyruvate (PEP) to regenerate ATP  
255 in the reaction, while 3-PGA utilizes maltodextrin to energize the reaction through substrate  
256 phosphorylation and glycolysis. Further experimentation is needed to elucidate specific  
257 components leading to solvent sensitivity.



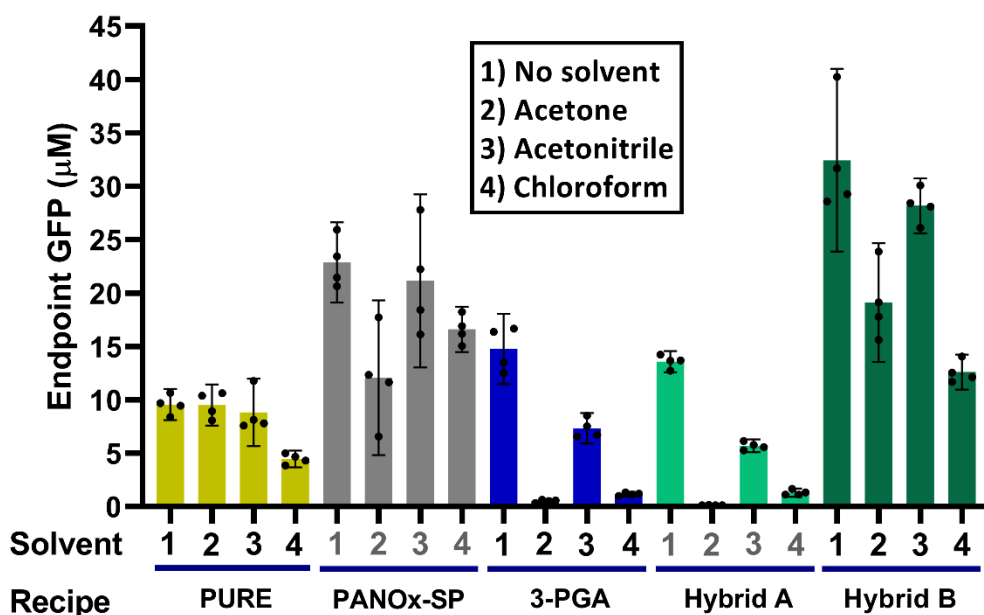

258  
259 **Figure 4** Comparison of different CFPS recipes challenged with organic solvents. Endpoint GFP  
260 concentrations are compared for five CFPS recipes after exposure to organic solvents. Error  
261 bars represent the 95% confidence interval. Recipe labeled “Hybrid A” is a CFPS reaction mixing  
262 PANOx-SP *E. coli* extract and 3-PGA reagent mix. “Hybrid B” is a mixture of 3-PGA extract and  
263 PANOx-SP reagent mix.

264  
265 *Summary*

266 The study of the interaction between cell-free reaction components and organic solvents  
267 revealed several new findings. Lyophilized CFPS reactions tolerate exposure to a variety of  
268 organic solvents without loss or with only partial loss of transcription and translation activity.  
269 The degree to which activity is lost by solvent exposure depends on the type of solvent and the  
270 ingredients in the lyophilized mixture. Experiments comparing different CFPS recipes indicate  
271 that differences in the cell extract preparation are less important for solvent tolerance than the  
272 composition of the other ingredients in a CFPS reaction. For acetone exposure, 10xSS alone was  
273 sufficient to provide solvent tolerance to the *E. coli* lysate, and DNA and HEPES buffer  
274 components provided partial protection.

275  
276 These newly-discovered characteristics of cell-free systems open the door to many previously  
277 elusive applications and directions of study. For instance, the ability to process the biological  
278 components of cell-free systems in organic solvents without loss of activity is likely to enable  
279 casting these systems into polymeric matrices such as polyurethane that do not dissolve in  
280 water. It may also be possible to dose a cell-free sensor system with non-aqueous substrates or  
281 analytes. Further study of cell-free systems’ interactions with organic solvent could lead to  
282 fundamental insights in non-aqueous enzymology and protein folding. The tolerance of CFPS to  
283 solvent when lyophilized raises the question of whether complex systems like the ribosome can

284 maintain activity in an organic solvent either naturally or through engineering. The ability to  
285 study these processes in a non-native context is an advantage unique to cell-free systems.

286

## 287 **Materials and Methods**

### 288 *Reagents*

289 The vendor and catalog number for each organic solvent used in this study is provided in  
290 Supplementary Table S1 describing solvent properties. Unless otherwise noted, all other  
291 reagents were purchased from Millipore Sigma, St. Louis, MO. Commercial PURExpress kits  
292 were purchased from New England Biolabs, Ipswich MA. The plasmid template for expression  
293 of GFP via CFPS is PY71sfGFP with genbank accession number MT346027 (38). Plasmid DNA was  
294 purified from transformed *E. coli* using a Promega PureYield plasmid midiprep kit, followed by  
295 ethanol precipitation to further concentrate and purify the DNA. DNA is stored in RNase and  
296 DNase-free water at -20°C until reaction assembly.

297

### 298 *CFPS reaction preparation*

299 PANOX-SP cell extract is prepared from shake flask cultures of *E. coli* BL21 Star (DE3) according  
300 to the growth and sonication protocol detailed previously by Kwon and Jewett (11). 3-PGA cell  
301 extract is prepared from shake flask cultures of *E. coli* BL21 Rosetta2 and lysed by pressure with  
302 a Microfluidizer cell homogenizer. The growth and lysis methods were based closely on  
303 protocols published previously by Noireaux et al (3, 37).

304

305 Lysates were aliquoted, flash frozen in liquid nitrogen, and stored at -80°C until use in CFPS  
306 reaction assembly. To assemble reactions, CFPS components including PURExpress kit solutions,  
307 cell lysates, and reagent stock solutions, were thawed on ice, then combined with DNase free  
308 water to reach the final concentrations listed in Supplementary Table S4. Reaction mixtures  
309 were well mixed and distributed 15 µL per well into 96 well, v-bottom, polypropylene plates  
310 (Costar 3357). Further details on the preparation of CFPS lysates and reagent mixes for PANOX-  
311 SP and 3-PGA recipes, as well as lyophilization methods are described in the supplemental  
312 information.

313

### 314 *Solvent treatment and rehydration of CFPS reactions*

315 All solvent treatments are performed in a chemical fume hood. 100 µL of each solvent was  
316 added to the lyophilized CFPS reaction mixture in designated wells. No solvent was added to  
317 lyophilized control reactions. Wells were sealed with a flexible polypropylene mat (Costar 3080)  
318 to prevent evaporation. Reactions were incubated with solvent for one hour at room  
319 temperature. Following solvent incubation, plates were briefly spun at low speed in a  
320 centrifuge to settle the insoluble CFPS reaction components, then solvents were removed by  
321 aspiration with a pipette without disturbing the pellet. The residual solvent was removed by  
322 evaporation. This was achieved either by allowing the plate to sit uncovered in the fume hood  
323 for ambient evaporation, or applying a vacuum at room temperature using a vacuum oven with  
324 the heating element turned off for 20 minutes. After solvent removal, all reactions were

325 rehydrated with 15  $\mu$ L of DNase free water to return CFPS reaction components to their original  
326 aqueous concentration. Reaction assembly and solvent treatment methods for the PANOx-SP  
327 CFPS component screen are described in the supplemental information.

328  
329 *Monitoring GFP formation via microplate reader*  
330 Immediately after rehydration, plates were sealed with a polypropylene mat, transferred to a  
331 BioTek Synergy H1 microplate reader, and incubated at 30°C for 8 hours. Formation of GFP  
332 fluorescence was monitored with ex/em: 485/528 nm with a gain of 100. GFP readings in RFU  
333 were converted to  $\mu$ M GFP using fluorescence measurements of purified GFP standards.

### 334 335 **Abbreviations**

336 CFPS = cell-free protein synthesis  
337 GFP = green fluorescent protein  
338 DCM = dichloromethane  
339 DMF = dimethylformamide  
340 DMSO = dimethylsulfoxide  
341 THF = tetrahydrofuran

### 342 343 **Acknowledgements**

344 We thank Stephanie Cole for providing materials for the 3-PGA experiments. We also thank  
345 Michael Jewett's laboratory at Northwestern University and Vincent Noireaux's laboratory at  
346 University of Minnesota for sharing advice and detailed protocols. This work was made possible  
347 by funding from the Office of the Secretary of Defense's Applied Research for the Advancement  
348 of Science and Technology Priorities program. Follow-on funding was provided by the CCD C  
349 Surface Science Initiative. This work was completed while author Marilyn Lee held an NRC  
350 research associateship supported by the CCD C Biological Engineering for Applied Materials  
351 Solutions (BEAMS) program.

### 352 353 **Supporting Information**

354 Additional methods details; kinetics data; data and additional interpretation for solvent  
355 property correlations, removal of residual solvent by washing, and increased lyophilization  
356 volumes

### 357 358 **References**

- 359  
360 1. M. C. Jewett, J. R. Swartz, Mimicking the Escherichia coli cytoplasmic environment  
361 activates long-lived and efficient cell-free protein synthesis. *Biotechnology and*  
362 *Bioengineering* **86**, 19–26 (2004).

- 363 2. M. C. Jewett, K. A. Calhoun, A. Voloshin, J. J. Wu, J. R. Swartz, An integrated cell-free  
364 metabolic platform for protein production and synthetic biology. *Molecular Systems*  
365 *Biology* **4**, 220 (2008).
- 366 3. Z. Z. Sun, *et al.*, Protocols for Implementing an Escherichia coli Based TX-TL Cell-Free  
367 Expression System for Synthetic Biology. *Journal of Visualized Experiments* (2013)  
368 <https://doi.org/10.3791/50762> (December 31, 2019).
- 369 4. F. Caschera, V. Noireaux, Synthesis of 2.3 mg/ml of protein with an all Escherichia coli cell-  
370 free transcription–translation system. *Biochimie* **99**, 162–168 (2014).
- 371 5. Y. Y. Wu, *et al.*, System-level studies of a cell-free transcription-translation platform for  
372 metabolic engineering. *bioRxiv* (2017) <https://doi.org/10.1101/172007> (December 31,  
373 2019).
- 374 6. D.-M. Kim, J. R. Swartz, Regeneration of adenosine triphosphate from glycolytic  
375 intermediates for cell-free protein synthesis. *Biotechnology and Bioengineering* **74**, 309–  
376 316 (2001).
- 377 7. Q. M. Dudley, A. S. Karim, M. C. Jewett, Cell-free metabolic engineering: Biomanufacturing  
378 beyond the cell. *Biotechnology Journal* **10**, 69–82 (2015).
- 379 8. A. S. Karim, M. C. Jewett, A cell-free framework for rapid biosynthetic pathway  
380 prototyping and enzyme discovery. *Metabolic Engineering* **36**, 116–126 (2016).
- 381 9. A. S. Karim, J. T. Heggstad, S. A. Crowe, M. C. Jewett, Controlling cell-free metabolism  
382 through physiochemical perturbations. *Metabolic Engineering* **45**, 86–94 (2018).
- 383 10. A. D. Silverman, A. S. Karim, M. C. Jewett, Cell-free gene expression: an expanded  
384 repertoire of applications. *Nature Reviews Genetics* **21**, 151–170 (2020).
- 385 11. Y.-C. Kwon, M. C. Jewett, High-throughput preparation methods of crude extract for  
386 robust cell-free protein synthesis. *Scientific Reports* **5** (2015).
- 387 12. Y. Shimizu, *et al.*, Cell-free translation reconstituted with purified components. *Nature*  
388 *Biotechnology* **19**, 751–755 (2001).
- 389 13. A. Gräwe, *et al.*, A paper-based, cell-free biosensor system for the detection of heavy  
390 metals and date rape drugs. *PLOS ONE* **14**, e0210940 (2019).
- 391 14. M. K. Takahashi, *et al.*, A low-cost paper-based synthetic biology platform for analyzing gut  
392 microbiota and host biomarkers. *Nature Communications* **9** (2018).
- 393 15. M. P. McNerney, *et al.*, Point-of-care biomarker quantification enabled by sample-specific  
394 calibration. *Science Advances* **5**, eaax4473 (2019).

- 395 16. A. Meyer, *et al.*, Organism Engineering for the Bioproduction of the  
396 Triaminotrinitrobenzene (TATB) Precursor Phloroglucinol (PG). *ACS Synthetic Biology* **8**,  
397 2746–2755 (2019).
- 398 17. K. Pardee, Perspective: Solidifying the impact of cell-free synthetic biology through  
399 lyophilization. *Biochemical Engineering Journal* **138**, 91–97 (2018).
- 400 18. B. C. Bundy, *et al.*, Cell-free biomanufacturing. *Current Opinion in Chemical Engineering* **22**,  
401 177–183 (2018).
- 402 19. D. K. Karig, S. Bessling, P. Thielen, S. Zhang, J. Wolfe, Preservation of protein expression  
403 systems at elevated temperatures for portable therapeutic production. *Journal of The*  
404 *Royal Society Interface* **14**, 20161039 (2017).
- 405 20. N. E. Gregorio, *et al.*, Unlocking Applications of Cell-Free Biotechnology through Enhanced  
406 Shelf Life and Productivity of *E. coli* Extracts. *ACS Synthetic Biology* (2020)  
407 <https://doi.org/10.1021/acssynbio.9b00433> (April 2, 2020).
- 408 21. M. T. Smith, S. D. Berkheimer, Lyophilized *Escherichia coli* -based cell-free systems for  
409 robust, high-density, long-term storage. *BioTechniques* **56** (2014).
- 410 22. P. Sadat Mousavi, *et al.*, A multiplexed, electrochemical interface for gene-circuit-based  
411 sensors. *Nature Chemistry* **12**, 48–55 (2020).
- 412 23. K. Pardee, *et al.*, Paper-Based Synthetic Gene Networks. *Cell* **159**, 940–954 (2014).
- 413 24. T. T. M. Duyen, *et al.*, Paper-based colorimetric biosensor for antibiotics inhibiting  
414 bacterial protein synthesis. *Journal of Bioscience and Bioengineering* **123**, 96–100 (2017).
- 415 25. M. W. Tibbitt, J. E. Dahlman, R. Langer, Emerging Frontiers in Drug Delivery. *Journal of the*  
416 *American Chemical Society* **138**, 704–717 (2016).
- 417 26. H. Tian, *et al.*, Biobased Polyurethane, Epoxy Resin, and Polyolefin Wax Composite Coating  
418 for Controlled-Release Fertilizer. *ACS Applied Materials & Interfaces* **11**, 5380–5392 (2019).
- 419 27. D. Ding, Q. Zhu, Recent advances of PLGA micro/nanoparticles for the delivery of  
420 biomacromolecular therapeutics. *Materials Science and Engineering: C* **92**, 1041–1060  
421 (2018).
- 422 28. N. Kamaly, B. Yameen, J. Wu, O. C. Farokhzad, Degradable Controlled-Release Polymers  
423 and Polymeric Nanoparticles: Mechanisms of Controlling Drug Release. *Chemical Reviews*  
424 **116**, 2602–2663 (2016).
- 425 29. P. B. Dennis, A. Y. Walker, M. B. Dickerson, D. L. Kaplan, R. R. Naik, Stabilization of  
426 Organophosphorus Hydrolase by Entrapment in Silk Fibroin: Formation of a Robust

- 427 Enzymatic Material Suitable for Surface Coatings. *Biomacromolecules* **13**, 2037–2045  
428 (2012).
- 429 30. A. M. Klibanov, Improving enzymes by using them in organic solvents. *Nature* **409**, 241–  
430 246 (2001).
- 431 31. J. L. Schmitke, L. J. Stern, A. M. Klibanov, Comparison of x-ray crystal structures of an acyl-  
432 enzyme intermediate of subtilisin Carlsberg formed in anhydrous acetonitrile and in water.  
433 *Proceedings of the National Academy of Sciences* **95**, 12918–12923 (1998).
- 434 32. J. E. Kay, M. C. Jewett, A cell-free system for production of 2,3-butanediol is robust to  
435 growth-toxic compounds. *Metabolic Engineering Communications* **10**, e00114 (2020).
- 436 33. N. Doukyu, H. Ogino, Organic solvent-tolerant enzymes. *Biochemical Engineering Journal*  
437 **48**, 270–282 (2010).
- 438 34. S. D. Cole, *et al.*, Quantification of Interlaboratory Cell-Free Protein Synthesis Variability.  
439 *ACS Synthetic Biology* **8**, 2080–2091 (2019).
- 440 35. J. L. Dopp, Y. R. Jo, N. F. Reuel, Methods to reduce variability in E. Coli-based cell-free  
441 protein expression experiments. *Synthetic and Systems Biotechnology* **4**, 204–211 (2019).
- 442 36. A. D. Silverman, N. Kelley-Loughnane, J. B. Lucks, M. C. Jewett, Deconstructing Cell-Free  
443 Extract Preparation for *in Vitro* Activation of Transcriptional Genetic Circuitry. *ACS*  
444 *Synthetic Biology* **8**, 403–414 (2019).
- 445 37. J. Garamella, R. Marshall, M. Rustad, V. Noireaux, The All *E. coli* TX-TL Toolbox 2.0: A  
446 Platform for Cell-Free Synthetic Biology. *ACS Synthetic Biology* **5**, 344–355 (2016).
- 447 38. B. C. Bundy, J. R. Swartz, Site-Specific Incorporation of *p*-Propargyloxyphenylalanine in a  
448 Cell-Free Environment for Direct Protein–Protein Click Conjugation. *Bioconjugate*  
449 *Chemistry* **21**, 255–263 (2010).

450 **For Table of Contents Only**

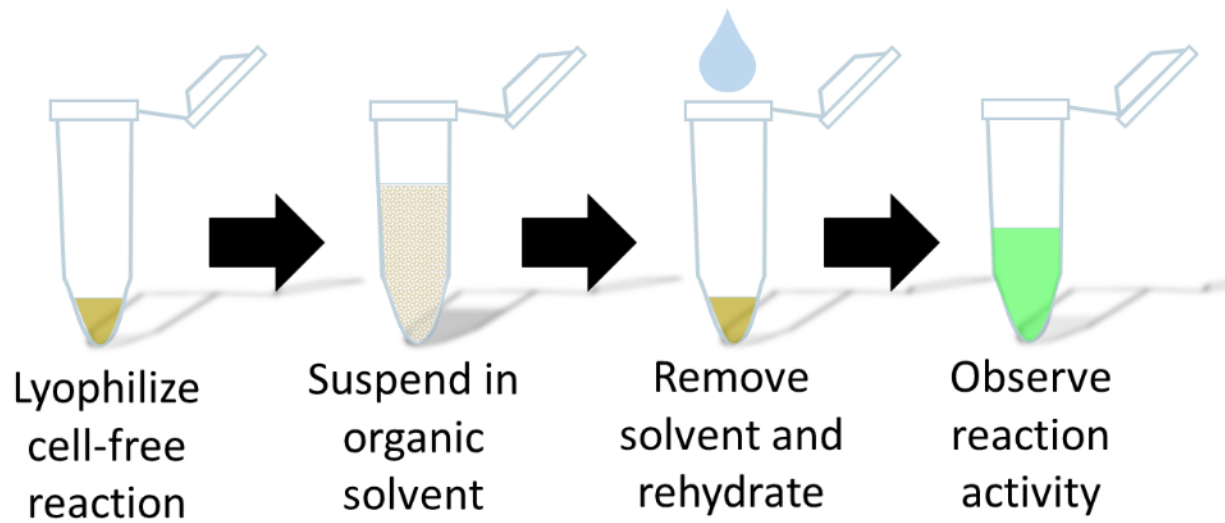

451
