# Supplementary material for: Lyophilized cell-free systems display tolerance to organic solvent exposure
Source: bioRxiv or medRxiv preprint supplement (doi:10.1101/2020.06.11.121418), 2020-06-12
Supplement: Supplementary file [file media-1.pdf]

1 **Lyophilized cell-free systems display tolerance to organic solvent**  
2 **exposure**

3 Supplemental Information

4 Marilyn S. Lee<sup>a</sup>, Rebecca Raig<sup>b,c</sup>, Maneesh K. Gupta<sup>b</sup>, Matthew W. Lux<sup>a\*</sup>

5 <sup>a</sup>US Army Combat Capabilities Development Command Chemical and Biological Center, 8567

6 Ricketts Point Road, Aberdeen Proving Ground, MD 21010 USA, <sup>b</sup>US Air Force Research

7 Laboratory, 2179 12<sup>th</sup> St., B652/R122 Wright-Patterson Air Force Base, OH 45433 USA, <sup>c</sup>UES

8 Inc., 4401 Dayton-Xenia Rd., Dayton, OH 45432 USA

9

10 \*Corresponding author:

11 Matthew W. Lux

12 Correspondence: 8567 Ricketts Point Road, Bldg E3549 Room B140, APG, MD USA 21010

13 Phone: 410-436-1448

14 Email: [matthew.w.lux.civ@mail.mil](mailto:matthew.w.lux.civ@mail.mil)

15

## 16 Supplementary Information

17

### 18 **Supplementary Results and Discussion**

#### 19 *Lyophilizing larger batches of CFPS reaction mixture and measuring water content*

20 Larger 250  $\mu$ L scale batches of PANOx-SP CFPS reaction were lyophilized for 48 hours to achieve  
21 sufficient dryness to allow milling into a powder (Supplementary Figure S5A). Lyophilization for  
22 only 20 hours resulted in a viscid cake that could not be milled and was difficult handle, though  
23 still demonstrated normal CFPS activity when rehydrated (data not shown). After 48-hr drying,  
24 the dry weight of the powder stabilized at approximately 76 mg per 1 mL of aqueous CFPS  
25 solution. Thermogravimetric analysis (TGA) is another more sensitive technique to quantify the  
26 amount of water remaining in the sample and only requires around 5 mg of sample for the  
27 measurement. TGA measurements indicate that 250  $\mu$ L samples lyophilized for 48 hours were  
28 between 1.2% and 3% water by weight (Supplementary Figure S5B). Endpoint GFP productivity  
29 was the same after lyophilization and exposure to acetone compared to a freshly prepared  
30 CFPS reaction (Supplementary Figure S5C).

31

#### 32 *Correlation of Solvent Properties and CFPS productivity*

33 Correlation analysis comparing GFP productivity to each of several parameters describing the  
34 physical and chemical properties of solvents is summarized in Supplementary Figures S2 and S3,  
35 and Supplementary Tables S2 and S3. This analysis sheds light on the trends in solvent  
36 characteristics that affect CFPS activity. Supplementary Figure S2 depicts correlation plots for  
37 samples where complete CFPS reactions were exposed to solvents. Significant Pearson  
38 correlation coefficients were found comparing productivity and solvent boiling point, dielectric  
39 constant, Hansen polar parameter, Hansen hydrogen bond parameter, and the octanol/water  
40 partition coefficient (log Kow). However, when lysate alone was exposed to organic solvents  
41 (Supplementary Figure S3), there were no clear trends between productivity and solvent  
42 properties except for a slight but significant relationship to the Hansen dispersion parameter.  
43 For complete reaction exposures, decreased solvent hydrogen bonding propensity or increase  
44 hydrophobicity correlates with improved productivity, suggesting solvents that participate in  
45 molecular interactions similar to water could cause a greater extent of deactivation likely by an  
46 increased ability to strip water molecules crucial to protein function. Some polar solvents like  
47 ethanol also have a greater tendency to absorb water from the air, which could introduce  
48 sufficient concentrations of water to allow protein unfolding or hydrolysis of molecules in the  
49 resource mix. There appears to be a cutoff value for solvent boiling point. Two solvents with a  
50 high boiling point, DMF and DMSO, caused inhibition of GFP productivity. This could be an  
51 indication that trace amounts of these less-volatile solvents are not sufficiently removed by  
52 evaporation.

53

#### 54 *Solvent evaporation at ambient conditions*

55 A reduced solvent screen was also implemented without applying a vacuum to learn how  
56 evaporation at ambient conditions could affect solvent compatibility. Acetonitrile, acetone,  
57 methanol and ethanol were tested on complete lyophilized CFPS reactions. The results are

58 depicted in Figure 2B. GFP productivity is not significantly different for the conditions tested as  
59 compared to samples dried with a vacuum.

60

#### 61 *Acetonitrile washes to remove DMSO do not improve exposure outcomes*

62 Since DMSO has a relatively high boiling point of 189°C, it is not clear that evaporation with or  
63 without application of a vacuum would be sufficient to remove the solvent from the system in  
64 the time allotted before rehydration. It is possible that DMSO causes inactivation of the  
65 reaction by protein unfolding or resource extraction, or inhibition is caused by residual DMSO  
66 left behind during the rehydration step. To ascertain the real cause, the removal of DMSO was  
67 improved by washing with a more volatile solvent. In this test, lyophilized CFPS components  
68 were suspended in DMSO, and most of the DMSO was removed by aspiration as before. Then,  
69 acetonitrile was used to wash the insoluble CFPS components twice, followed by removal of the  
70 acetonitrile by aspiration and application of a vacuum. The activity of GFP expression upon  
71 rehydration following this treatment is depicted in Supplementary Figure S4. The acetonitrile  
72 washes did not improve the activity of CFPS following DMSO exposure, suggesting that DMSO  
73 likely decreases activity by disabling some component of the CFPS during the exposure rather  
74 than by residual solvent impacting the reaction.

75

76

### 77 **Supplementary Materials and Methods**

#### 78 *PANOx-SP lysate preparation*

79 *E. coli* BL21 DE3 star bacteria were pre-cultured from frozen stock in 100 mL 2xYPTG media in a  
80 500 mL shake flask at 37°C, 250 rpm for 16 hours. 5 mL of the pre-culture was used to seed 1 L  
81 of 2xYPTG media in a 2 L baffled shake flask that was shaken at 37°C, 250 rpm for  
82 approximately 3.25 hours, or until optical density at 600 nm reaches 3.0. Cells were then  
83 pelleted by centrifugation at 5000xg for 15 minutes and washed four times with S30A buffer  
84 (10 mM Tris acetate pH 8.2, 14 mM magnesium acetate, 60 mM potassium acetate, 2 mM DTT).  
85 The wet weight of the pellet was then measured before the pellet was flash frozen in liquid  
86 nitrogen and stored at -80°C until further processing. For lysis, cell pellets were re-suspended in  
87 cold S30A buffer at 1 mL buffer per 1 g wet cell mass, then lysed by sonication on ice in 1.5 mL  
88 aliquots (Qsonica Q500, 20% amplitude, 40 seconds on, 59 seconds off, 540 J total energy). 4.5  
89 µL 1 M DTT is added to each tube after sonication. Lysates were then centrifuged at 12,000xg  
90 for 10 minutes at 4°C and the supernatant was collected, aliquoted, flash frozen in liquid  
91 nitrogen, and stored at -80°C until reaction assembly.

92

#### 93 *3-PGA lysate preparation*

94 *E. coli* BL21 Rosetta2 bacteria were pre-cultured 7 hours at 37°C, 250 rpm from a colony in 3 mL  
95 2xYPT media in a 14 mL culture tube. 30 µL of the pre-culture were then transferred to  
96 inoculate a “midi-culture” in 60 mL 2xYPT media in a 500 mL Erlenmeyer flask and was  
97 incubated 7 hours at 37°C, 250 rpm. Then, four 750 mL 2xYPT final cultures in 2.5 L baffled  
98 flasks are each inoculated with 7.5 mL of the midi-culture. Flasks are incubated with shaking at  
99 37°C, 250 rpm for three hours or when optical density at 600 nm reaches 1.5-1.6. Cells were

100 then pelleted at 5000xg for 10 minutes and washed four times with S30A\* buffer (50 mM Tris  
101 pH 8.2, 14 mM magnesium glutamate, 60 mM potassium glutamate, 2 mM DTT). Note this  
102 S30A\* buffer differs from the PANOX-SP S30A buffer by using magnesium and potassium salts  
103 with glutamate counter ion. The wet weight of the cell mass is measured, then diluted by a  
104 factor of 2.05mL per gram with S30A\* buffer. A M-110P microfluidizer set to 16,000 psi is used  
105 to lyse the cells (Microfluidics, Westwood, MA). The lysate is centrifuged at 18000 rpm, 20 min,  
106 4°C. The supernatant is pooled, then incubated 90 minutes at 37°C in a run-off reaction. Then,  
107 the lysate is centrifuged again at 20,000 rpm, 10 min, 2°C. The lysate supernatant is dialyzed for  
108 1 hour at 4°C against 950 mL S30B buffer (14 mM magnesium glutamate, 150 mM potassium  
109 glutamate, 2M Tris pH 8.2, 1 mM DTT) before a last centrifugation at 20,000 rpm, 10 min, 2°C.  
110 The treated lysate supernatant is aliquoted, flash frozen in liquid nitrogen, and stored at -80°C  
111 until reaction assembly.

112

### 113 *CFPS Reagent preparation*

114 For PANOX-SP, a pre-mix solution was assembled containing magnesium glutamate, potassium  
115 glutamate, ammonium glutamate, ATP, GTP, CTP, UTP, folinic acid, tRNAs, each of the 20  
116 canonical amino acids, phosphoenolpyruvate (PEP), nicotinamide adenine dinucleotide (NAD),  
117 coenzyme A (CoA), spermidine, putrescine, oxalic acid, and HEPES buffer (pH 7.4).

118 Concentrations of each component in the final reaction are listed in Table S4. This premix stock  
119 solution was aliquoted, flash frozen in liquid nitrogen, and stored at -80°C until use in CFPS  
120 reaction assembly. In addition, leftover stock solutions of each component were flash frozen  
121 alone and stored at -80°C for use in the CFPS component screen experiment. Three PANOX-SP  
122 ingredients not included in the premix are stored separately at -20°C until reaction assembly:  
123 purified T7 RNA polymerase (RNAP), murine RNase inhibitor (New England Biolabs), and  
124 purified plasmid DNA.

125

126 The reagents added to 3-PGA CFPS reaction are somewhat different than PANOX-SP. The pre-  
127 mix solution for 3-PGA contains ATP, GTP, CTP, UTP, folinic acid, tRNAs, NAD, CoA, Spermidine,  
128 HEPES buffer (pH 8), cyclic adenosine monophosphate (cAMP), 3-phosphoglyceric acid (3-PGA),  
129 and dithiothreitol (DTT). Concentrations of each component in the final reaction are listed in  
130 Table S4. This premix is also aliquoted, flash frozen in liquid nitrogen, and stored at -80°C. A  
131 stock solution of all 20 amino acids are aliquoted and stored separately at -80°C. Other  
132 component stock solutions are stored at -20°C: potassium glutamate, magnesium glutamate,  
133 polyethylene glycol (PEG), and T7 RNAP. A maltodextrin solution is prepared fresh before  
134 reaction assembly.

135

### 136 *Lyophilization of CFPS reactions*

137 To lyophilize CFPS reactions in a microplate, the 96 well plate is dipped in liquid nitrogen and  
138 transferred to a shelf-type lyophilizer (SP Scientific, VirTis Wizard 2.0) with initial temperature  
139 set to -40°C. When the lyophilizer chamber is sealed, the vacuum is initiated to reach  
140 approximately 200-300 mTorr. Then, primary drying is initiated with a shelf temperature of -  
141 20°C and maintained for four hours. The Secondary drying step changes the shelf temperature  
142 to 15°C, and is maintained overnight or approximately 17 hours. Microplate samples removed

143 from the lyophilizer were immediately treated with solvent as indicated and rehydrated to  
144 monitor protein synthesis activity.

145

#### 146 *Acetonitrile wash after DMSO exposure*

147 Acetonitrile washes after DMSO exposure were tested for improved solvent removal. After  
148 DMSO exposure as described above, the insoluble reaction material is washed twice with 100  
149  $\mu$ L washes of acetonitrile, which are removed by aspiration followed by evaporation under a  
150 vacuum for 20 minutes. Reactions were rehydrated as described.

151

#### 152 *Preparation, acetone treatment, and analysis of larger scale CFPS powder*

153 Larger 250  $\mu$ L scale PANOx-SP CFPS reactions were assembled on ice in 1.5-mL Eppendorf  
154 tubes. For larger scale reactions, we pre-expressed T7 RNA polymerase in the E. coli culture  
155 used to make cell extract rather than adding T7 RNAP purified separately. Also, we omitted the  
156 RNase inhibitor ingredient. These cost-saving measures did not majorly impact productivity in  
157 solvent tolerance experiments. The tubes were flash frozen in liquid nitrogen and transferred to  
158 a FreeZone 4.5 Liter benchtop manifold lyophilizer set to 0.08 mBar with internal refrigeration  
159 at -105°C. Samples were lyophilized for 48 hrs. The dry weight of the sample and tube were  
160 measured, and the weight of the tube alone was subtracted to find the dry weight of the CFPS  
161 mixture. The lyophilized CFPS cake was easily ground to a powder using a pipet tip. This powder  
162 was weighed into aliquots for TGA analysis. To compare acetone tolerance to fresh reactions, a  
163 250  $\mu$ L CFPS mixture was lyophilized and milled as above, submerged in 200  $\mu$ L of acetone, and  
164 rehydrated in 250  $\mu$ L of nuclease-free water. 5  $\mu$ L aliquots of the rehydrated solution were  
165 distributed into clear, v-bottom 96 well plates to track GFP fluorescence using a SpectraMax M5  
166 Microplate Reader. Reactions were carried out over the course of 4 hours at 30°C. Fluorescence  
167 signal was monitored with an ex/em of 490/515 nm with gain set to 'low'. GFP signal in relative  
168 fluorescence units (RFU) was converted to  $\mu$ M GFP using fluorescence measurements of a  
169 purified GFP standard at the same settings on the microplate reader.

170

#### 171 *PANOx-SP CFPS component screen*

172 CFPS components were screened to identify which components of the lysate-based PANOx-SP  
173 CFPS method could contribute to protect lyophilized lysate during acetone exposure. The  
174 component stock solutions tested are DNA, T7 RNAP, RNase inhibitor, 10xSS, HEPES, 15xMM,  
175 20AA, PEP, NAD, CoA, oxalic acid, putrescine, and spermidine. 10xSS refers to a solution of  
176 magnesium, potassium, and ammonium glutamate. "15xMM" is a solution of ATP, GTP, UTP,  
177 CTP, folinic acid, and tRNA. "20AA" is a solution containing all 20 canonical amino acids. Control  
178 reactions were labeled "None", referring to PANOx-SP cell extract without any additional  
179 ingredients, and "Complete," a complete PANOx-SP CFPS reaction mixture. Each component  
180 stock solution was stored frozen separately until reaction assembly.

181

182 To assemble reactions, each component listed above was first combined with lysate and water  
183 to reach a volume of 15  $\mu$ L per well in the microplate. The plate was flash frozen in liquid

184 nitrogen and lyophilized as described above. 100  $\mu$ L acetone was added to solvent wells for one  
185 hour while control wells were left untreated. A polypropylene mat was used as before to  
186 prevent solvent evaporation. Following acetone treatment, the majority of the solvent was  
187 removed by aspiration with care not to disturb the insoluble pellet. The remaining solvent was  
188 allowed to evaporate at room temperature in a fume hood (without application of a vacuum).  
189 Then, all reactions apart from the “complete” reaction controls were rehydrated with a mixture  
190 of water and all components of a complete CFPS reaction excluding the lysate (pre-mix, T7  
191 RNAP, RNase inhibitor, and DNA stock solutions). “complete” control wells were rehydrated  
192 with water. This experimental setup results in a final concentration two times that of a normal  
193 reaction for the component being tested. For example, in the wells testing the DNA component,  
194 DNA is at a 1x6.4 nM concentration prior to lyophilization, but at a 2x6.4 nM concentration  
195 after rehydration with water and CFPS reagents. Acetone treatment results are normalized to  
196 the no-solvent control to isolate the effect of each added component on acetone sensitivity of  
197 the lysate.

198

199

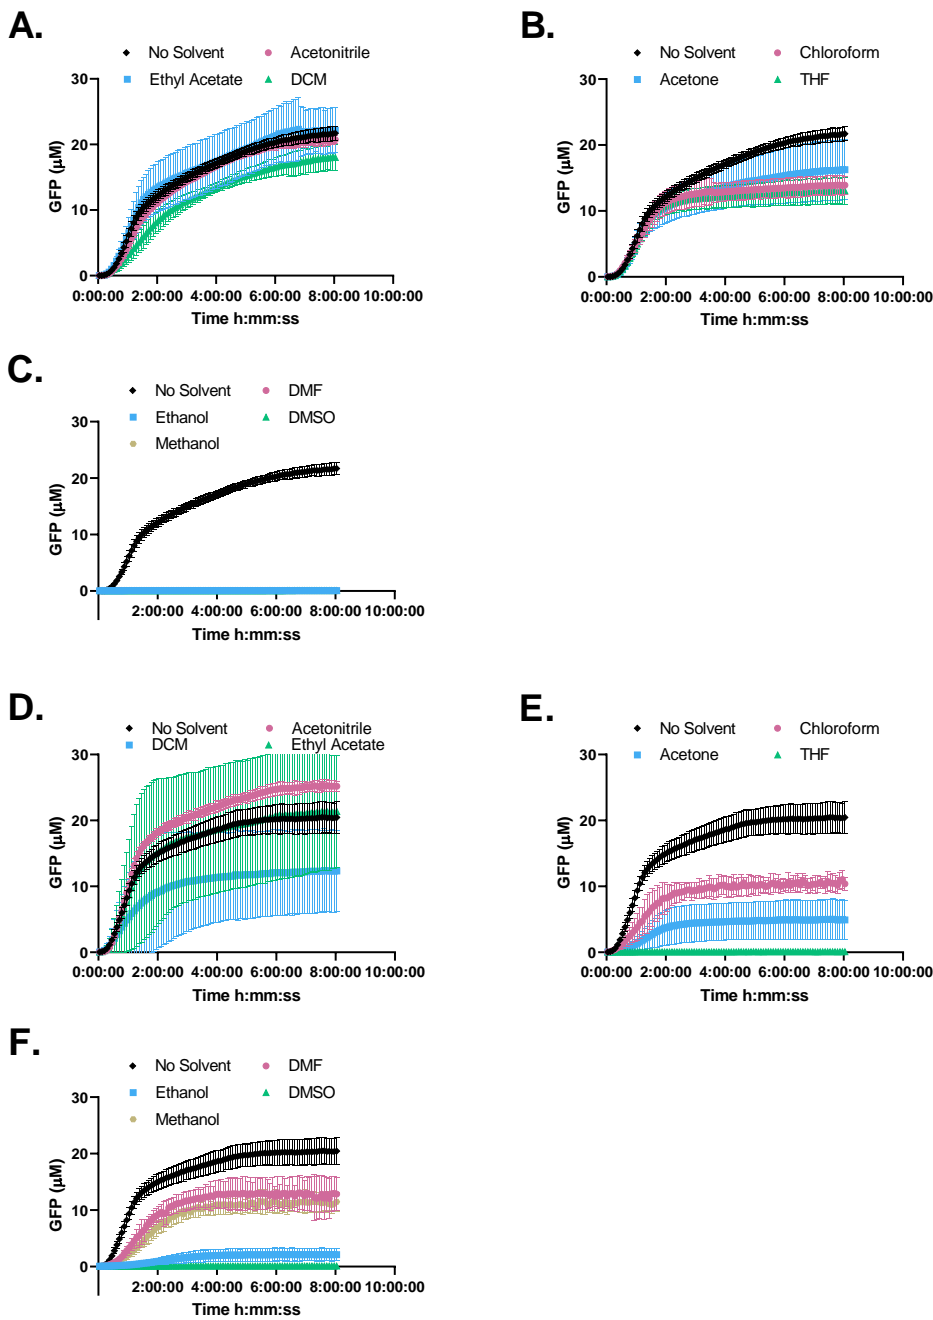

201  
 202 **Figure S1** Kinetics plots of solvent screen with endpoints represented in Figure 2 of the main  
 203 text. Complete reactions exposed to solvent (a-c), cell lysate only exposed to solvent (d-f).  
 204

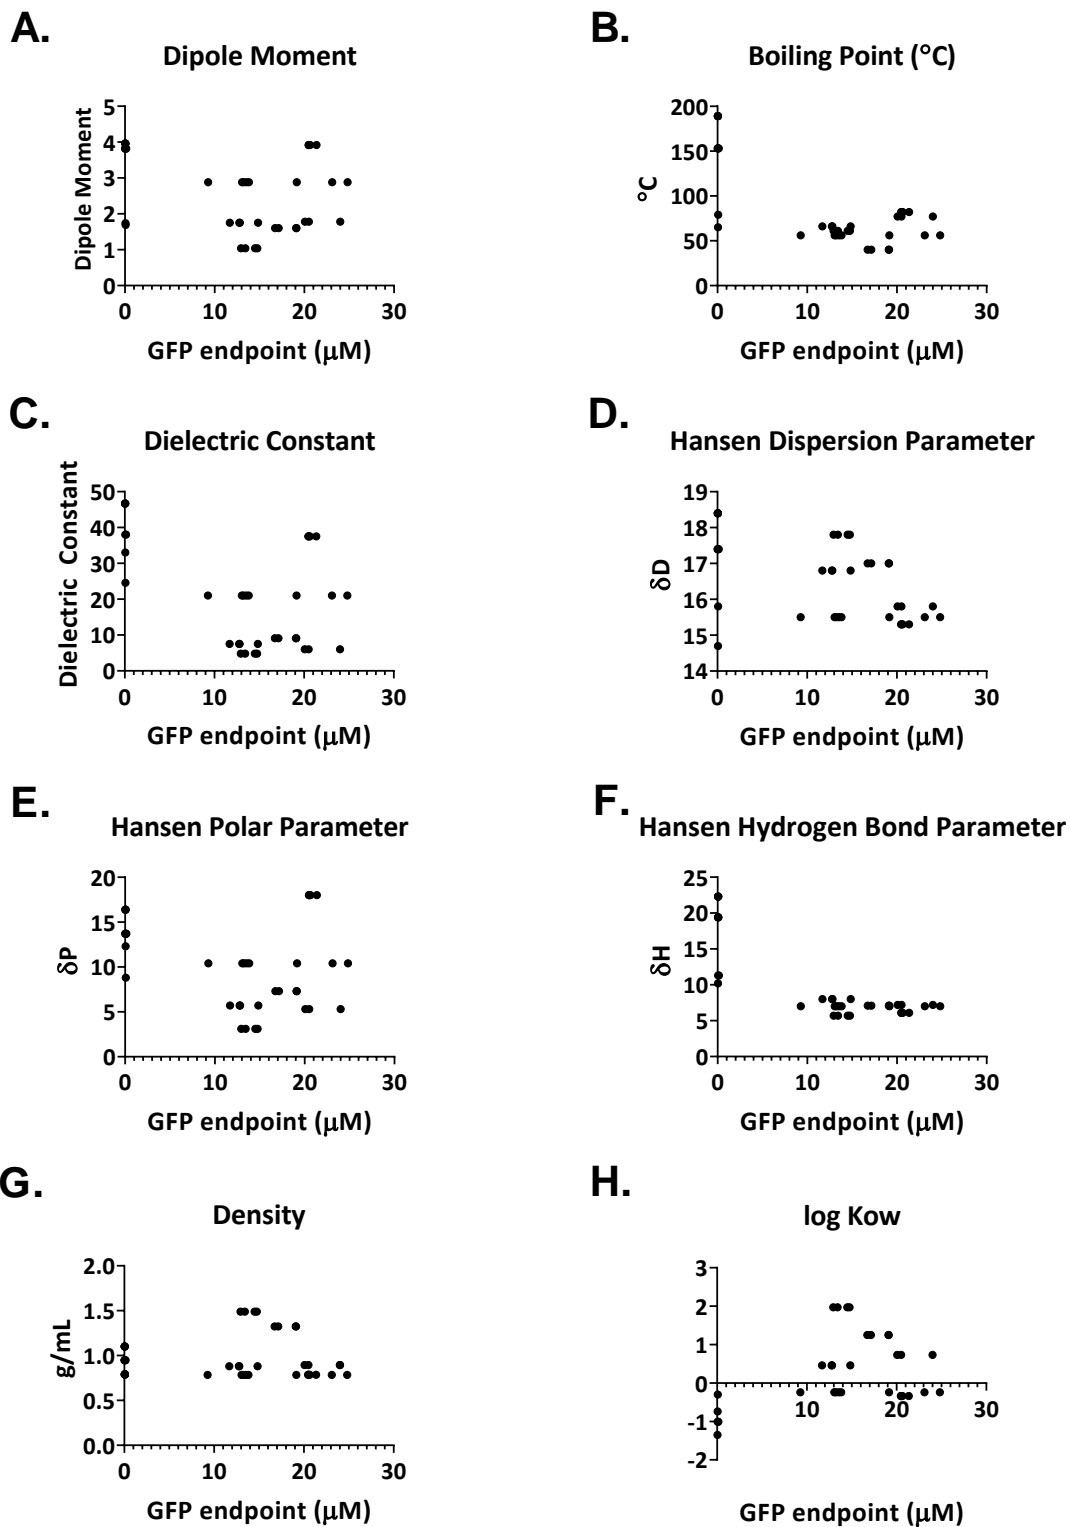

205  
 206 **Figure S2** Correlation plots comparing endpoint GFP productivity to the physical property  
 207 parameters of the organic solvents used. Lyophilized, complete CFPS reactions were exposed to  
 208 solvent, then rehydrated with water.



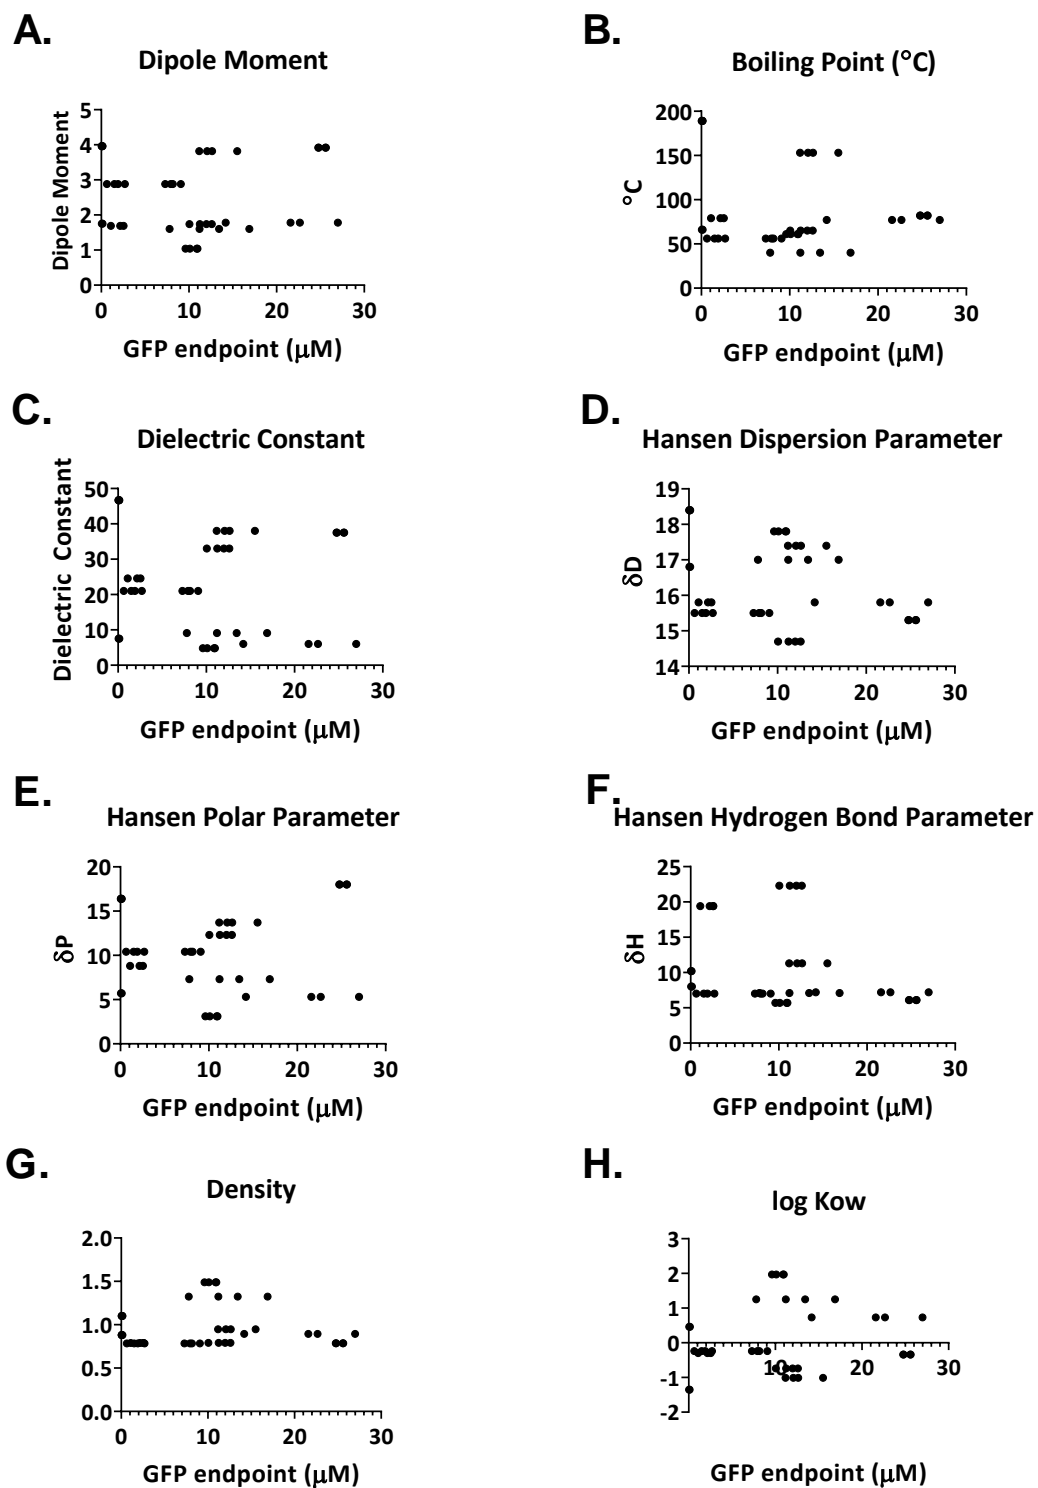

209  
 210 **Figure S3** Correlation plots comparing endpoint GFP productivity of solvent-exposed lysate to  
 211 the physical property parameters of the organic solvents used. Lyophilized lysate was exposed  
 212 to solvent alone, then complemented with the other ingredients of a complete CFPS reaction  
 213 upon rehydration.

214

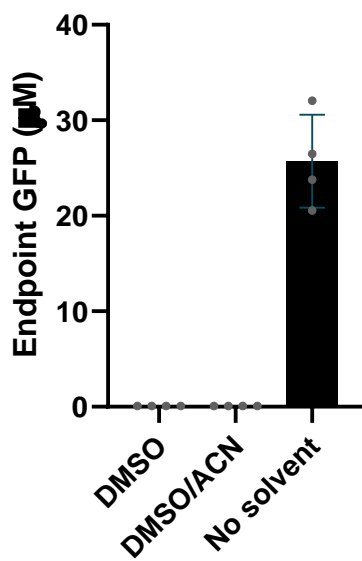

215  
216 **Figure S4** Washing with acetonitrile to remove DMSO. Each bar across the x-axis is labeled with  
217 the solvent treatment. “DMSO/ACN” refers to samples treated first with DMSO, then washed  
218 with acetonitrile.

219

220

A.

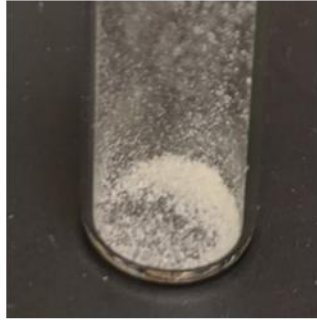

B.

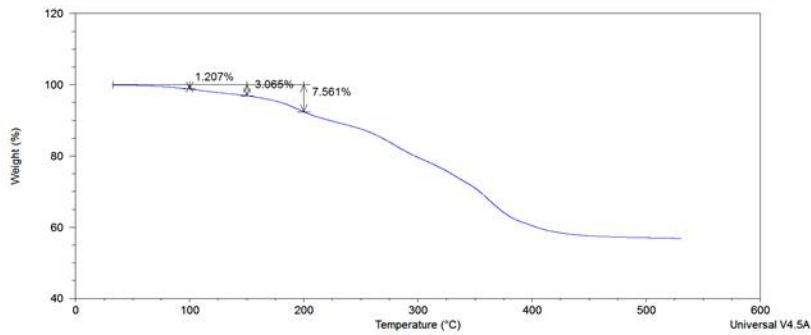

C.

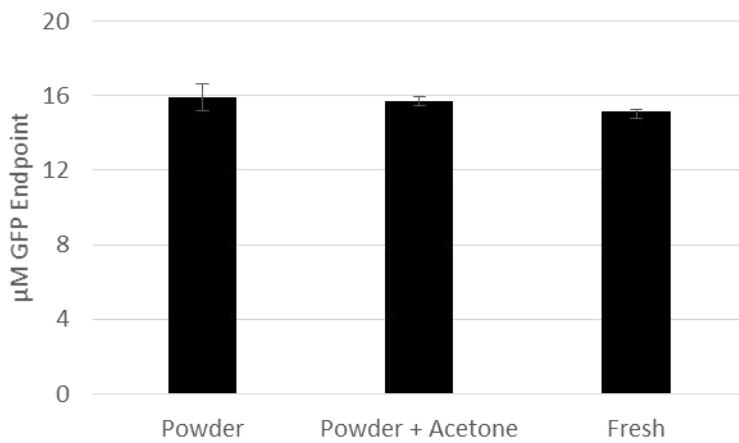

221

222

223

224

225

226

**Figure S5** CFPS powder after 48 hr lyophilization (a). TGA analysis of the powder (b) where water is the first volatile component and makes up 1.2-3% of the initial weight. Endpoint GFP concentrations after rehydration of CFPS powder and incubation for 8 hours, with and without acetone treatment (c). Non-lyophilized control reaction is labeled “fresh.”

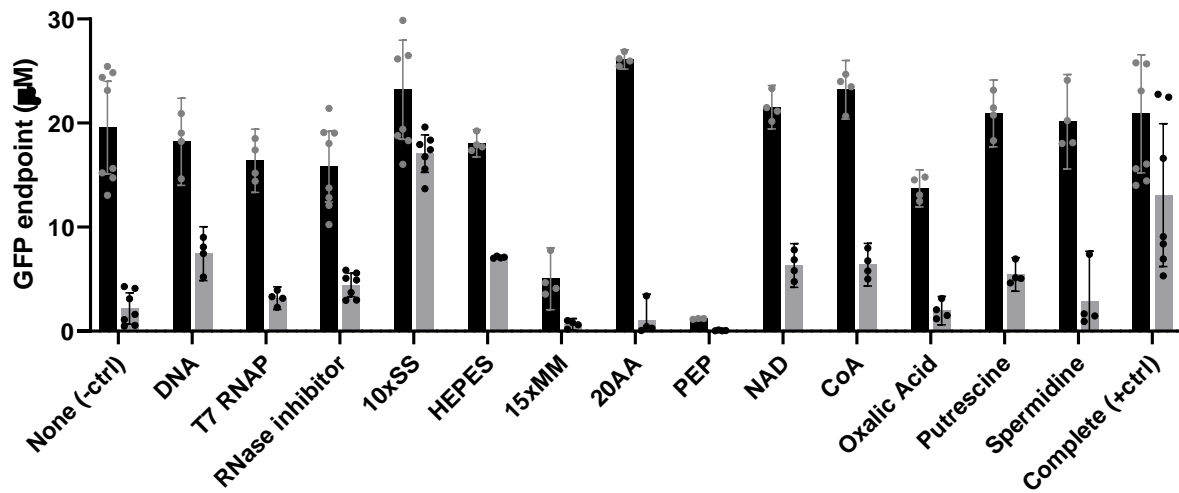

227  
 228  
 229  
 230  
 231  
 232  
 233  
 234  
 235

**Figure S6** Non-normalized PANOx-SP CFPS component screen for acetone tolerance. Black bars are results from a control without solvent exposure. Grey bars refer to a 1 hr acetone exposure. Acetone is evaporated under ambient conditions. Each set of bars is labeled with the CFPS ingredient used to supplement the lysate sample at drying. The negative control labeled “None” is lysate without any supplemented additive. The positive control labeled “Complete” includes all CFPS ingredients.

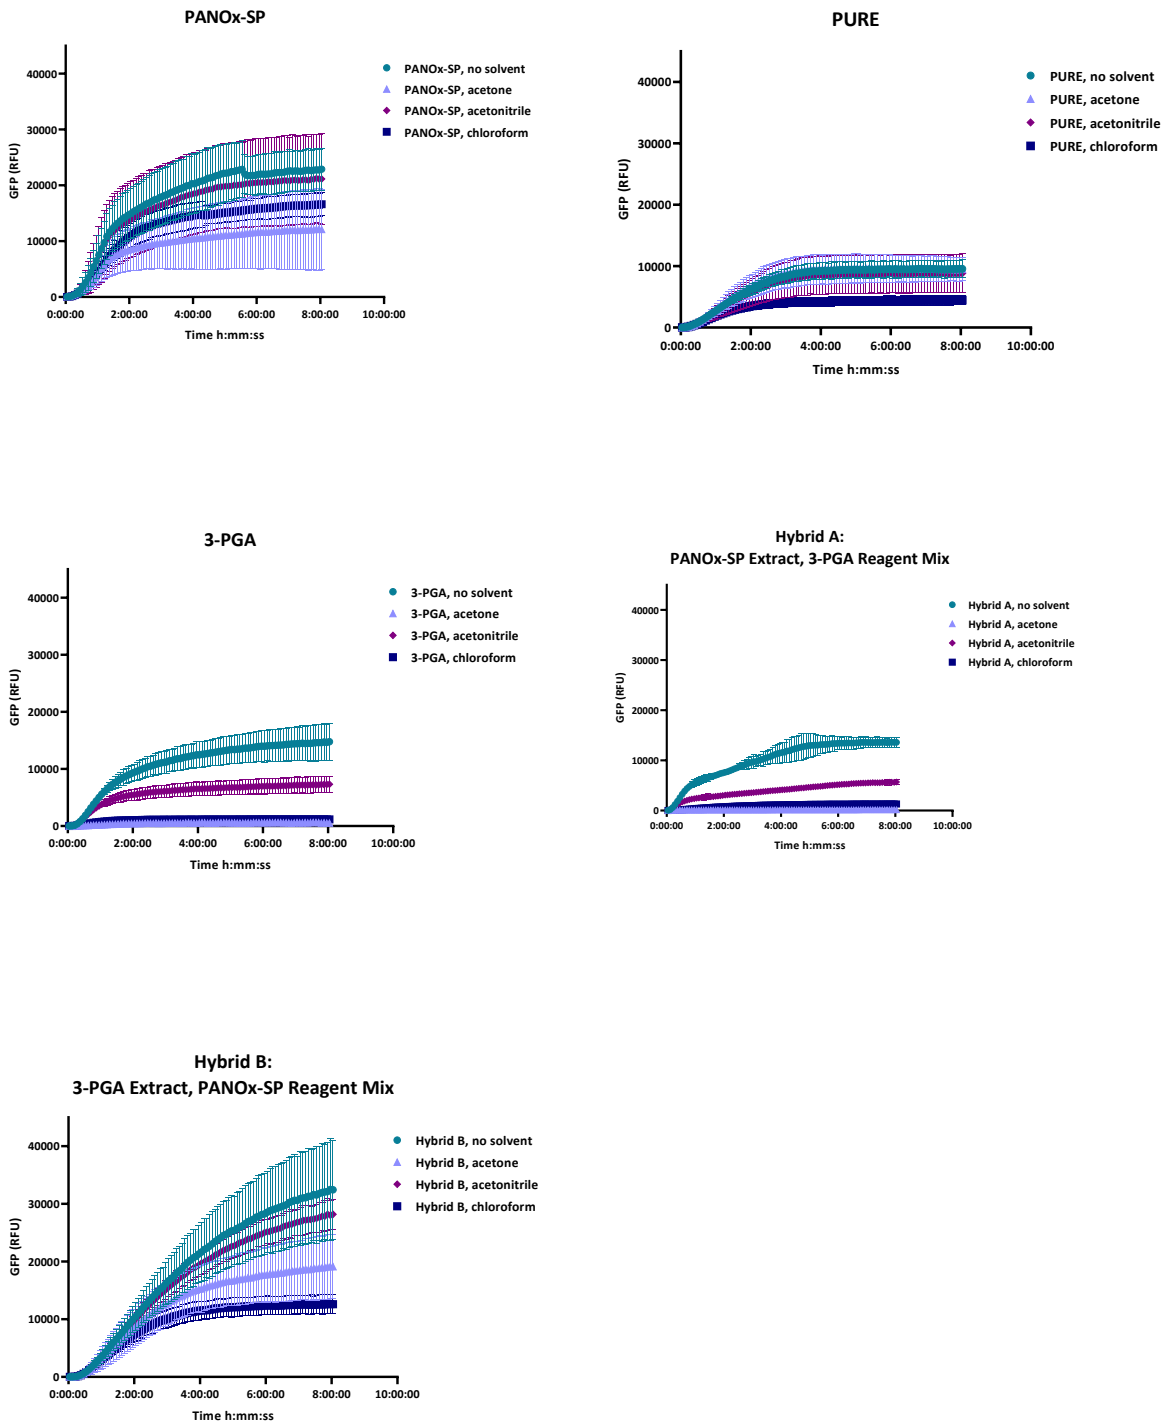

236  
 237 **Figure S7** Kinetics plots for different CFPS recipes exposed to four solvent conditions. Plots  
 238 correspond to Figure 4 endpoint data in the main text.

239  
 240  
 241

242 Supplementary Tables243 **Table S1** Solvent properties and source information

| Solvent           | Vendor          | Catalog No. | Solvent Group | Dipole Moment | Boiling Point (°C) | Dielectric Constant | Hansen Dispersion Parameter | Hansen Polar Parameter | Hansen Hydrogen Bond Parameter | Density | Log(Kow) |
|-------------------|-----------------|-------------|---------------|---------------|--------------------|---------------------|-----------------------------|------------------------|--------------------------------|---------|----------|
| Acetone           | Millipore-Sigma | 270725      | Polar aprotic | 2.88          | 56                 | 21                  | 15.5                        | 10.4                   | 7.0                            | 0.7845  | -0.240   |
| Acetonitrile      | Millipore-Sigma | 360457      | Polar aprotic | 3.92          | 82                 | 37.5                | 15.3                        | 18                     | 6.1                            | 0.7860  | -0.340   |
| Ethyl Acetate     | Acros           | 42368-0040  | Polar aprotic | 1.78          | 77                 | 6.02                | 15.8                        | 5.3                    | 7.2                            | 0.8940  | 0.730    |
| Dimethylformamide | Millipore-Sigma | 186317      | Polar aprotic | 3.82          | 153                | 38                  | 17.4                        | 13.7                   | 11.3                           | 0.9480  | -1.010   |
| Dichloromethane   | Millipore-Sigma | D65100-4L   | Non-polar     | 1.60          | 40                 | 9.1                 | 17.0                        | 7.3                    | 7.1                            | 1.3250  | 1.250    |
| Tetrahydrofuran   | Millipore-Sigma | 34865-100mL | Polar aprotic | 1.75          | 66                 | 7.5                 | 16.8                        | 5.7                    | 8                              | 0.8800  | 0.460    |
| Ethanol           | Millipore-Sigma | 493511-4L   | Polar protic  | 1.69          | 79                 | 24.55               | 15.8                        | 8.8                    | 19.4                           | 0.7893  | -0.300   |
| Methanol          | Fisher          | A411-4      | Polar protic  | 1.74          | 65                 | 33                  | 14.7                        | 12.3                   | 22.3                           | 0.7910  | -0.740   |
| Chloroform        | Fisher          | C6060-1     | Non-polar     | 1.04          | 61                 | 4.81                | 17.8                        | 3.1                    | 5.7                            | 1.4900  | 1.970    |
| DMSO              | Sigma           | D2650       | Polar aprotic | 3.96          | 189                | 46.7                | 18.4                        | 16.4                   | 10.2                           | 1.1000  | -1.350   |

244

245

246 **Table S2** Correlation statistics for productivity of solvent-exposed CFPS reactions

| GFP endpoint ( $\mu\text{M}$ )<br>Complete reaction exposure | vs.<br>Dipole Moment | vs.<br>Boiling Point | vs.<br>Dielectric Constant | vs.<br>Hansen Dispersion | vs.<br>Hansen Polar | vs.<br>Hansen Hydrogen Bond | vs.<br>Density    | vs.<br>log( $K_{ow}$ ) |
|--------------------------------------------------------------|----------------------|----------------------|----------------------------|--------------------------|---------------------|-----------------------------|-------------------|------------------------|
| <b>Pearson r</b>                                             |                      |                      |                            |                          |                     |                             |                   |                        |
| r                                                            | -0.1556              | -0.5766              | -0.5830                    | -0.2311                  | -0.3196             | -0.7478                     | 0.08675           | 0.5907                 |
| 95% confidence interval                                      | -0.4325 to 0.1481    | -0.7458 to -0.3375   | -0.7501 to -0.3460         | -0.4941 to 0.07063       | -0.5631 to -0.02514 | -0.8549 to -0.5796          | -0.2157 to 0.3740 | 0.3653 to 0.7552       |
| R squared                                                    | 0.02423              | 0.3325               | 0.3399                     | 0.05341                  | 0.1022              | 0.5592                      | 0.007526          | 0.3489                 |
| <b>P value</b>                                               |                      |                      |                            |                          |                     |                             |                   |                        |
| P (two-tailed)                                               | 0.3130               | <0.0001              | <0.0001                    | 0.1312                   | 0.0344              | <0.0001                     | 0.5755            | <0.0001                |
| P value summary                                              | ns                   | ****                 | ****                       | ns                       | *                   | ****                        | ns                | ****                   |
| Significant?<br>(alpha = 0.05)                               | No                   | Yes                  | Yes                        | No                       | Yes                 | Yes                         | No                | Yes                    |
| <b>Number of XY Pairs</b>                                    |                      |                      |                            |                          |                     |                             |                   |                        |
|                                                              | 44                   | 44                   | 44                         | 44                       | 44                  | 44                          | 44                | 44                     |

247

248

249 **Table S3** Correlation statistics for productivity of solvent-exposed *E. coli* lysate

| GFP endpoint (μM)<br>Complete reaction<br>exposure | vs.<br>Dipole Moment | vs.<br>Boiling Point | vs.<br>Dielectric Constant | vs.<br>Hansen Dispersion | vs.<br>Hansen Polar | vs.<br>Hansen Hydrogen Bond | vs.<br>Density    | vs.<br>log(Kow)   |
|----------------------------------------------------|----------------------|----------------------|----------------------------|--------------------------|---------------------|-----------------------------|-------------------|-------------------|
| <b>Pearson r</b>                                   |                      |                      |                            |                          |                     |                             |                   |                   |
| r                                                  | 0.09429              | -0.1509              | -0.02309                   | -0.3073                  | 0.1437              | -0.2137                     | -0.002955         | 0.1932            |
| 95% confidence interval                            | -0.2084 to 0.3805    | -0.4286 to 0.1528    | -0.3178 to 0.2757          | -0.5537 to -0.01151      | -0.1600 to 0.4226   | -0.4801 to 0.08882          | -0.2996 to 0.2942 | -0.1100 to 0.4635 |
| R squared                                          | 0.008891             | 0.02277              | 0.0005334                  | 0.09446                  | 0.02065             | 0.04566                     | 8.730e-006        | 0.03732           |
| <b>P value</b>                                     |                      |                      |                            |                          |                     |                             |                   |                   |
| P (two-tailed)                                     | 0.5426               | 0.3282               | 0.8817                     | 0.0424                   | 0.3521              | 0.1637                      | 0.9848            | 0.2089            |
| P value summary                                    | ns                   | ns                   | ns                         | *                        | ns                  | ns                          | ns                | ns                |
| Significant?<br>(alpha = 0.05)                     | No                   | No                   | No                         | Yes                      | No                  | No                          | No                | No                |
| <b>Number of XY Pairs</b>                          |                      |                      |                            |                          |                     |                             |                   |                   |
|                                                    | 44                   | 44                   | 44                         | 44                       | 44                  | 44                          | 44                | 44                |

250



251 **Table S4** Final concentrations of components in three different CFPS buffers

| Component           | PANOx-SP          | 3-PGA                         | PURE                                               |
|---------------------|-------------------|-------------------------------|----------------------------------------------------|
| Magnesium glutamate | 12 mM             | 10 mM + 4.62 mM <sup>†</sup>  | -                                                  |
| Potassium glutamate | 130 mM            | 30 mM + 49.5 mM <sup>†</sup>  | 100 mM                                             |
| Ammonium glutamate  | 10 mM             | -                             | -                                                  |
| Magnesium acetate   | 3.7 mM*           | -                             | 13 mM                                              |
| Potassium acetate   | 16.02 mM*         | -                             | -                                                  |
| Tris acetate        | 2.67 mM (pH 8.2)* | 1.65 mM (pH 8.2) <sup>†</sup> | -                                                  |
| HEPES               | 57 mM (pH 7.4)    | 50 mM (pH 8)                  | 50 mM (pH 7.6)                                     |
| ATP                 | 1.2 mM            | 1.5 mM                        | 2 mM                                               |
| GTP                 | 0.85 mM           | 1.5 mM                        | 2 mM                                               |
| CTP                 | 0.85 mM           | 0.9 mM                        | 1 mM                                               |
| UTP                 | 0.85 mM           | 0.9 mM                        | 1 mM                                               |
| Folinic acid        | 0.072 mM          | 0.068 mM                      | 0.02 mM                                            |
| tRNA                | 170.6 µg/mL       | 200 µg/mL                     | 2.8 A <sub>260</sub> units in 50 µL =<br>3.5 mg/mL |
| Alanine             | 2 mM              | 3 mM                          | 0.3 mM                                             |
| Arginine            | 2 mM              | 3 mM                          | 0.3 mM                                             |
| Histidine           | 2 mM              | 3 mM                          | 0.3 mM                                             |
| Lysine (monoHCl)    | 2 mM              | 3 mM                          | 0.3 mM                                             |
| Aspartic acid       | 2 mM              | 3 mM                          | 0.3 mM                                             |
| Glutamic acid       | 2 mM              | 3 mM                          | 0.3 mM                                             |
| Isoleucine          | 2 mM              | 3 mM                          | 0.3 mM                                             |
| Leucine             | 2 mM              | 3 mM                          | 0.3 mM                                             |
| Methionine          | 2 mM              | 3 mM                          | 0.3 mM                                             |
| Phenylalanine       | 2 mM              | 3 mM                          | 0.3 mM                                             |
| Tryptophan          | 2 mM              | 3 mM                          | 0.3 mM                                             |
| Tyrosine            | 2 mM              | 3 mM                          | 0.3 mM                                             |
| Valine              | 2 mM              | 3 mM                          | 0.3 mM                                             |
| Serine              | 2 mM              | 3 mM                          | 0.3 mM                                             |
| Threonine           | 2 mM              | 3 mM                          | 0.3 mM                                             |
| Asparagine          | 2 mM              | 3 mM                          | 0.3 mM                                             |
| Glutamine           | 2 mM              | 3 mM                          | 0.3 mM                                             |
| Cysteine            | 2 mM              | 3 mM                          | 0.3 mM                                             |
| Glycine             | 2 mM              | 3 mM                          | 0.3 mM                                             |
| Proline             | 2 mM              | 3 mM                          | 0.3 mM                                             |
| PEP                 | 33 mM             | -                             | -                                                  |

|                    |            |              |          |
|--------------------|------------|--------------|----------|
| NAD                | 0.33 mM    | 0.33 mM      | -        |
| CoA                | 0.27 mM    | 0.26 mM      | -        |
| Spermidine         | 1.5 mM     | 1 mM         | 2 mM     |
| Putrescine         | 1 mM       | -            | -        |
| Oxalic acid        | 4 mM       | -            | -        |
| T7 RNA polymerase  | 100 µg/mL  | 100 µg/mL    | 10 µg/mL |
| Plasmid DNA        | 6.4 nM     | 6.4 nM       | 6.4 nM   |
| RNase Inhibitor    | 0.8 U/µL   | -            | -        |
| Cell extract       | 26.7% v/v* | 33% v/v†     | -        |
| Maltodextrin       | -          | 30 mM        | -        |
| PEG                | -          | 1.5 % w/v    | -        |
| cAMP               | -          | 0.75 mM      | -        |
| 3-PGA              | -          | 30 mM        | -        |
| DTT                | 0.8 mM*    | 1 mM+0.33mM† | 1 mM     |
| Creatine Phosphate | -          | -            | 20 mM    |

252 \* Items in Style I recipe added as part of the cell extract solution

253 † Items in Style II recipe added as part of the cell extract solution

254
